# Supplementary material
Source: publisher site journal article supplement (https://www.dovepress.com/article/343292)
Supplement: Supplementary file 1 [file get_supplementary_file.php]

**Supplementary Table1** **Genotypic Distribution of the CR-KP Isolates**

| **Strains** | [Resistance](javascript:;) [mechanism](javascript:;) | [Virulence](javascript:;) [genes](javascript:;) |
| --- | --- | --- |
| CR-KP01 | *bla*NDM-1, *blaSHV-1* | *fimH, wab G* |
| CR-KP02 | *bla*NDM-1, *bla*CTXM-14, *blaSHV-1* | *fimH, wab G, ent B* |
| CR-KP03 | *bla*NDM-1, *bla*CTXM-14, *blaSHV-1* | *fimH, wab G, ent B* |
| CR-KP04 | *bla*NDM-1, *bla*CTXM-14, *blaSHV-1* | *fimH, ent B* |
| CR-KP05 | *bla*NDM-1, *bla*CTXM-14, *blaSHV-1* | *fimH, wab G, ent B* |
| CR-KP06 | *bla*NDM-1, *bla*CTXM-14, *blaSHV-1* | *fimH, wab G, ent B* |
| CR-KP07 | *bla*NDM-1, *bla*CTXM-14, *blaSHV-1* | *fimH, wab G, ent B* |
| CR-KP08 | *bla*NDM-1, *bla*CTXM-14, *blaSHV-1* | *fimH, ent B* |
| CR-KP09 | *bla*NDM-1, *bla*CTXM-14, *blaSHV-1* | *fimH, wab G, ent B* |
| CR-KP10 | *bla*NDM-1, *bla*CTXM-14, *blaSHV-1* | *fimH, wab G, ent B* |
| CR-KP11 | *bla*NDM-1, *bla*CTXM-14, *blaSHV-1* | *fimH, wab G, ent B* |
| CR-KP12 | *bla*NDM-1, *bla*CTXM-14, *blaSHV-1* | *fimH, wab G, ent B* |
| CR-KP13 | *bla*NDM-1, *bla*CTXM-14, *blaSHV-1* | *fimH, wab G, ent B* |
| CR-KP14 | *bla*NDM-1, *bla*CTXM-14, *blaSHV-1* | *fimH, wab G, ent B* |

**Supplementary Table2** Significantly enriched KEGG pathways of DEGs between Type I and Type II *K. pneumoniae*

| Pathway ID | Pathway Description | DEGs with  pathway annotation | P value |
| --- | --- | --- | --- |
| [map00330](https://report.majorbio.com/prokrna/genesetkegg_rich_pathway/task_id/ds2b_nqgrof4o2m2ej4t8rcchrl/params/eyJwYXRod2F5X2hyZWYiOiJzM25iOi8vY29tbW9uYnVja2V0L2ZpbGVzL3BhdGh3YXlfaW1nL2tlZ2dfMjAyMDA3L21hcDAwMzMwLnBuZyIsImtlZ2dfcmljaF9pZCI6IjYxMzYyNDkwMWJiYzg0YTAwODlmOTllMiIsIm5hbWUiOiJHZW5lc2V0S2VnZ0VucmljaF8yMDIxMDkwNl8yMjI0MTY0MjYiLCAicGF0aHdheV9pZCI6Im1hcDAwMzMwIn0=.html) | Arginine and proline metabolism | 6 | 0.0001 |
| [map00071](https://report.majorbio.com/prokrna/genesetkegg_rich_pathway/task_id/ds2b_nqgrof4o2m2ej4t8rcchrl/params/eyJwYXRod2F5X2hyZWYiOiJzM25iOi8vY29tbW9uYnVja2V0L2ZpbGVzL3BhdGh3YXlfaW1nL2tlZ2dfMjAyMDA3L21hcDAwMDcxLnBuZyIsImtlZ2dfcmljaF9pZCI6IjYxMzYyNDkwMWJiYzg0YTAwODlmOTllMiIsIm5hbWUiOiJHZW5lc2V0S2VnZ0VucmljaF8yMDIxMDkwNl8yMjI0MTY0MjYiLCAicGF0aHdheV9pZCI6Im1hcDAwMDcxIn0=.html) | Fatty acid degradation | 3 | 0.0039 |
| [map00281](https://report.majorbio.com/prokrna/genesetkegg_rich_pathway/task_id/ds2b_nqgrof4o2m2ej4t8rcchrl/params/eyJwYXRod2F5X2hyZWYiOiJzM25iOi8vY29tbW9uYnVja2V0L2ZpbGVzL3BhdGh3YXlfaW1nL2tlZ2dfMjAyMDA3L21hcDAwMjgxLnBuZyIsImtlZ2dfcmljaF9pZCI6IjYxMzYyNDkwMWJiYzg0YTAwODlmOTllMiIsIm5hbWUiOiJHZW5lc2V0S2VnZ0VucmljaF8yMDIxMDkwNl8yMjI0MTY0MjYiLCAicGF0aHdheV9pZCI6Im1hcDAwMjgxIn0=.html) | Geraniol degradation | 2 | 0.004 |
| [map05131](https://report.majorbio.com/prokrna/genesetkegg_rich_pathway/task_id/ds2b_nqgrof4o2m2ej4t8rcchrl/params/eyJwYXRod2F5X2hyZWYiOiJzM25iOi8vY29tbW9uYnVja2V0L2ZpbGVzL3BhdGh3YXlfaW1nL2tlZ2dfMjAyMDA3L21hcDA1MTMxLnBuZyIsImtlZ2dfcmljaF9pZCI6IjYxMzYyNDkwMWJiYzg0YTAwODlmOTllMiIsIm5hbWUiOiJHZW5lc2V0S2VnZ0VucmljaF8yMDIxMDkwNl8yMjI0MTY0MjYiLCAicGF0aHdheV9pZCI6Im1hcDA1MTMxIn0=.html) | Shigellosis | 2 | 0.004 |
| [map00340](https://report.majorbio.com/prokrna/genesetkegg_rich_pathway/task_id/ds2b_nqgrof4o2m2ej4t8rcchrl/params/eyJwYXRod2F5X2hyZWYiOiJzM25iOi8vY29tbW9uYnVja2V0L2ZpbGVzL3BhdGh3YXlfaW1nL2tlZ2dfMjAyMDA3L21hcDAwMzQwLnBuZyIsImtlZ2dfcmljaF9pZCI6IjYxMzYyNDkwMWJiYzg0YTAwODlmOTllMiIsIm5hbWUiOiJHZW5lc2V0S2VnZ0VucmljaF8yMDIxMDkwNl8yMjI0MTY0MjYiLCAicGF0aHdheV9pZCI6Im1hcDAwMzQwIn0=.html) | Histidine metabolism | 2 | 0.024 |
| [map05133](https://report.majorbio.com/prokrna/genesetkegg_rich_pathway/task_id/ds2b_nqgrof4o2m2ej4t8rcchrl/params/eyJwYXRod2F5X2hyZWYiOiJzM25iOi8vY29tbW9uYnVja2V0L2ZpbGVzL3BhdGh3YXlfaW1nL2tlZ2dfMjAyMDA3L21hcDA1MTMzLnBuZyIsImtlZ2dfcmljaF9pZCI6IjYxMzYyNDkwMWJiYzg0YTAwODlmOTllMiIsIm5hbWUiOiJHZW5lc2V0S2VnZ0VucmljaF8yMDIxMDkwNl8yMjI0MTY0MjYiLCAicGF0aHdheV9pZCI6Im1hcDA1MTMzIn0=.html) | Pertussis | 2 | 0.037 |
| [map02060](https://report.majorbio.com/prokrna/genesetkegg_rich_pathway/task_id/ds2b_nqgrof4o2m2ej4t8rcchrl/params/eyJwYXRod2F5X2hyZWYiOiJzM25iOi8vY29tbW9uYnVja2V0L2ZpbGVzL3BhdGh3YXlfaW1nL2tlZ2dfMjAyMDA3L21hcDAyMDYwLnBuZyIsImtlZ2dfcmljaF9pZCI6IjYxMzYyNDkwMWJiYzg0YTAwODlmOTllMiIsIm5hbWUiOiJHZW5lc2V0S2VnZ0VucmljaF8yMDIxMDkwNl8yMjI0MTY0MjYiLCAicGF0aHdheV9pZCI6Im1hcDAyMDYwIn0=.html) | Phosphotransferase system (PTS) | 4 | 0.038 |
| [map00642](https://report.majorbio.com/prokrna/genesetkegg_rich_pathway/task_id/ds2b_nqgrof4o2m2ej4t8rcchrl/params/eyJwYXRod2F5X2hyZWYiOiJzM25iOi8vY29tbW9uYnVja2V0L2ZpbGVzL3BhdGh3YXlfaW1nL2tlZ2dfMjAyMDA3L21hcDAwNjQyLnBuZyIsImtlZ2dfcmljaF9pZCI6IjYxMzYyNDkwMWJiYzg0YTAwODlmOTllMiIsIm5hbWUiOiJHZW5lc2V0S2VnZ0VucmljaF8yMDIxMDkwNl8yMjI0MTY0MjYiLCAicGF0aHdheV9pZCI6Im1hcDAwNjQyIn0=.html) | Ethylbenzene degradation | 3 | 0.041 |
| [map00280](https://report.majorbio.com/prokrna/genesetkegg_rich_pathway/task_id/ds2b_nqgrof4o2m2ej4t8rcchrl/params/eyJwYXRod2F5X2hyZWYiOiJzM25iOi8vY29tbW9uYnVja2V0L2ZpbGVzL3BhdGh3YXlfaW1nL2tlZ2dfMjAyMDA3L21hcDAwMjgwLnBuZyIsImtlZ2dfcmljaF9pZCI6IjYxMzYyNDkwMWJiYzg0YTAwODlmOTllMiIsIm5hbWUiOiJHZW5lc2V0S2VnZ0VucmljaF8yMDIxMDkwNl8yMjI0MTY0MjYiLCAicGF0aHdheV9pZCI6Im1hcDAwMjgwIn0=.html) | Valine, leucine and isoleucine degradation | 1 | 0.042 |
| [map00362](https://report.majorbio.com/prokrna/genesetkegg_rich_pathway/task_id/ds2b_nqgrof4o2m2ej4t8rcchrl/params/eyJwYXRod2F5X2hyZWYiOiJzM25iOi8vY29tbW9uYnVja2V0L2ZpbGVzL3BhdGh3YXlfaW1nL2tlZ2dfMjAyMDA3L21hcDAwMzYyLnBuZyIsImtlZ2dfcmljaF9pZCI6IjYxMzYyNDkwMWJiYzg0YTAwODlmOTllMiIsIm5hbWUiOiJHZW5lc2V0S2VnZ0VucmljaF8yMDIxMDkwNl8yMjI0MTY0MjYiLCAicGF0aHdheV9pZCI6Im1hcDAwMzYyIn0=.html) | Benzoate degradation | 1 | 0.045 |
